# Supplementary material
Source: PubMed Central journal article supplement (PMC3190990)

**Supplementary Table 1: PCR primers used to assess transcription factor localization in ChIP assays or gene expression.**

**Supplementary Figure 1: Peaks of Egr1 binding are observed at start sites of many cholesterol biosynthetic promoters**

The binding of Egr1 to many cholesterol biosynthetic genes was determined using ChIP-chip assays of H4IIE cells treated with insulin. The ChIP samples were labeled with Cy5 (Egr1+insulin) or Cy3 (Egr1-insulin control) for hybridization to the genomic tiling array. The enrichment ratio of Cy5 to Cy3 was plotted on a log<sub>2</sub> scale and further processed to display a five-point moving average. Genomic location of peaks is displayed on the x-axis. Peaks of Egr1 binding coincide with transcription start sites of cholesterol biosynthetic genes such as *Hmgcs*, *Fdps*, *Nsdhl* and *Fdft1*. Arrows indicate gene location and transcriptional direction. These data are representative of 3 independent ChIP-chip experiments, and FDR values for these identified peaks are <0.05 using NimbleScan analysis.

**Supplementary Figure 2: Verification of ChIP-chip results at *Hmgcs*, *Fdps*, and *Nsdhl*.**

Gene elements identified as putative Egr1 binding sites were interrogated for Egr1 binding following insulin treatment for 1h using ChIP assays. Percentage recovery relative to input DNA was measured using qPCR with primers designed to detect putative EGR binding sites. The treatment of the cells is indicated on the x-axis (SF= serum free, Ins = 1h insulin) as is the promoter being tested, and darker bars indicate percent recovery of Egr1 at the locus while lighter bars indicate the level observed with nonspecific IgG immunoprecipitation.

**Supplementary Figure 3: Two NimbleScan analyses ChIP-chip of the *Hmgcr* Locus**

The binding of Egr1 to many cholesterol biosynthetic genes was determined using ChIP-chip assays of H4IIE cells treated with insulin. The ChIP samples were labeled with Cy5 (Egr1+insulin) or Cy3 (Egr1-insulin control) for hybridization to the genomic tiling array. Using NimbleScan software to analyze ChIP-chip data, peaks of binding can be identified that have a calculated false discovery rate of less than 0.05. These peaks are indicated in red as a separate track, indicating regions of strong binding of Egr1, and are coincident with the *Hmgcr* promoter. The *Hmgcr* locus is shown, as are the identified peaks from two separate experiments with H4IIEs treated with insulin for 1h.

**Supplementary Figure 4: Egr1 siRNA Specifically Reduced both Egr1 mRNA and protein**

H4IIE cells were transfected with either control siRNA or Egr1 specific siRNAs. RT-qPCR indicated a 50% reduction in the response of *Egr1* mRNA to insulin in cells transfected with siRNA for Egr1 after treatment with insulin for 30 minutes. A similar reduction in Egr1 protein was observed after 1.5h of insulin treatment. Average values from four independent experiments are shown and error bars represent standard deviation (asterisk indicates p<0.05, error bars indicate standard deviation, Welch t-test, n=4).

**Supplementary Figure 5: *Egr1*<sup>-/-</sup> mice have reduced serum cholesterol profiles**

Serum from wild type and *Egr1 null* mice was extracted and fractionated using FPLC and total cholesterol was assayed for each fraction. Average cholesterol values from each fraction are displayed as area under the curve from 10 wild-type and 10 knockout mice. The HDL containing portion of the serum is located in fractions 33-41, which are statistically reduced in transgenic mice (P<0.005). Error bars represent standard deviation.

**Supplementary Table 1: List of Primers**

|                             |                             |
|-----------------------------|-----------------------------|
| Mouse Hmgcr Promoter ChIP F | TCGTGACGTAGGCCGTCAG         |
| Mouse Hmgcr Promoter ChIP R | CCAATAAGGAAGGATCGTCCG       |
| Mouse Hmgcr +4kb ChIP F     | GGATTGCTCCCATTTACACA        |
| Mouse Hmgcr +4kb ChIP R     | TTTCCAATTGATTCAAGTTGTTTAGAC |
| Mouse Mod1 Promoter ChIP F  | ACGAGCCGAGGAAGCGA           |
| Mouse Mod1 Promoter ChIP R  | GGTGAACGCCAAGCGAGA          |
| Mouse Cyp51 Promoter ChIP F | AAGGCGCTCTGTGATTGCA         |
| Mouse Cyp51 Promoter ChIP R | ACATAGGCCGAGATCACCTCA       |
| Mouse Sqle Promoter ChIP F  | CCTGTAGCTCTTTGCGTTTGA       |
| Mouse Sqle Promoter ChIP R  | GCTCGCTCTGGAGGA ACTCTT      |
| Rat Cyp51 Promoter ChIP F   | AAGGCGCTCTGTGATTGCA         |
| Rat Cyp51 Promoter ChIP R   | ACATAGGCCGAGATCACCTCA       |
| Rat Hmgcr Promoter ChIP F   | TCGTGACGTAGGCCGTCAG         |
| Rat Hmgcr Promoter ChIP R   | CCAATAAGGAAGGATCGTCCG       |
| Rat Hmgcr -1.5kb ChIP F     | CACCACACACTGGGCATAATG       |
| Rat Hmgcr -1.5kb ChIP R     | GGGACGGCTCCTGTTTCACAC       |
| Rat Me1 Promoter ChIP F     | ACAGTGGACGAGCGGAGG          |
| Rat Me1 Promoter ChIP R     | AGCTGGTGAGCGCCGA            |
| Rat Hmgcs Promoter ChIP F   | CGTCATTGGCAGGCTTGTT         |
| Rat Hmgcs Promoter ChIP R   | AAAGTCGGAGGACCTGGGA         |
| Rat Mvd Promoter ChIP F     | AGAGCAAGAGGCTACTCCTCAGAA    |
| Rat Mvd Promoter ChIP R     | GCCTCTATTGTCACTCCAAAGCTT    |
| Rat Fdps Promoter ChIP F    | GAGAGGAAGGTTTCGGGCTCTT      |
| Rat Fdps Promoter ChIP R    | CGGTTCAAGGCCCTCAT           |
| Rat Sqle Promoter ChIP F    | CAGCGGCCGGTTAAGT            |
| Rat Sqle Promoter ChIP R    | GGCTAGCTCTGGAGGAGTTCC       |
| Rat Lss Promoter ChIP F     | TGAATAAAAACATCACACACCAAATTA |
| Rat Lss Promoter ChIP R     | TCAAACGCCAAGGACATTAAGTT     |
| Rat Nsdhl Promoter ChIP F   | CGGATACGGATGATCAATTGTACA    |
| Rat Nsdhl Promoter ChIP R   | TTTATAGAACGGAGATTCCCGAAA    |
| Rat Sc5d Promoter ChIP F    | GGCAGAGTCATTTGTCCCGTT       |
| Rat Sc5d Promoter ChIP R    | AGTGCGGGTTGATGAATGTTT       |
| 18S rRNA qPCR F             | CGCCGCTAGAGGTGAAATTCT       |
| 18S rRNA qPCR R             | CCAACCTCCGACTTTCGTTCT       |
| Rat Egr2 qPCR F             | GCACTCTGTGGCCCTAGAACA       |
| Rat Egr2 qPCR R             | GGCTGAGATGGCTCGAGAAA        |
| Rat Egr1 qPCR F             | AGAAGCCTTTTGCCTGTGACA       |
| Rat Egr1 qPCR R             | CGTTCATCACTCCTGGCAAAC       |
| Rat Hmgcr qPCR F            | CGCCCCTTAGGAGAATGACAT       |
| Rat Hmgcr qPCR R            | GAGGTGCGTACAGGCAAAGCTA      |
| Rat Me1 qPCR F              | GTGGCCTGTGGACTGAGACA        |
| Rat Me1 qPCR R              | TCAGCCGTGGTGAGGAAGA         |
| Rat Sqle qPCR F             | GTTGTGAACGTGCTGGCTCA        |
| Rat Sqle qPCR R             | CGGAGCTGACGCAAGGAAT         |
| Mouse Egr1 qPCR F           | AAGACACCCCCCATGAAC          |
| Mouse Egr1 qPCR R           | CTCATCCGAGCGAGAAAAGC        |
| Mouse Egr2 qPCR F           | TGCTAGCCCTTTCGTTGA          |
| Mouse Egr2 qPCR R           | TCTTTTCCGCTGTCCTCGAT        |

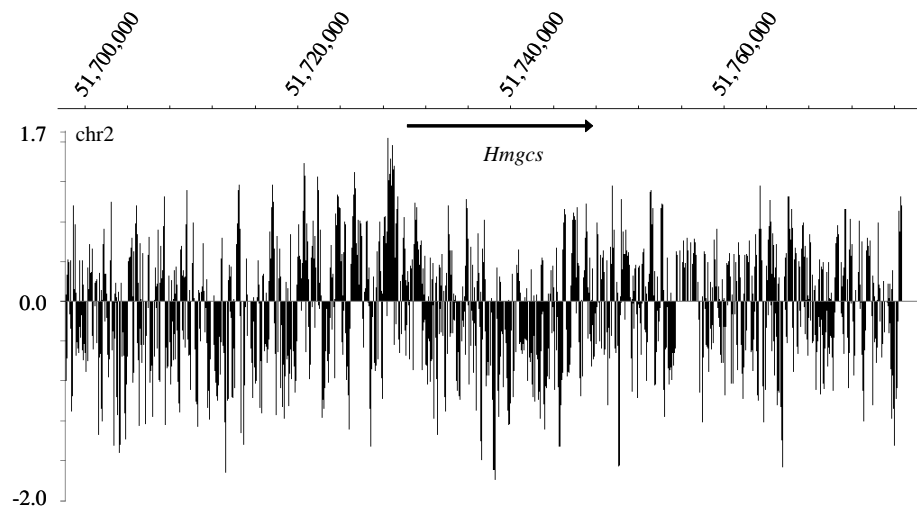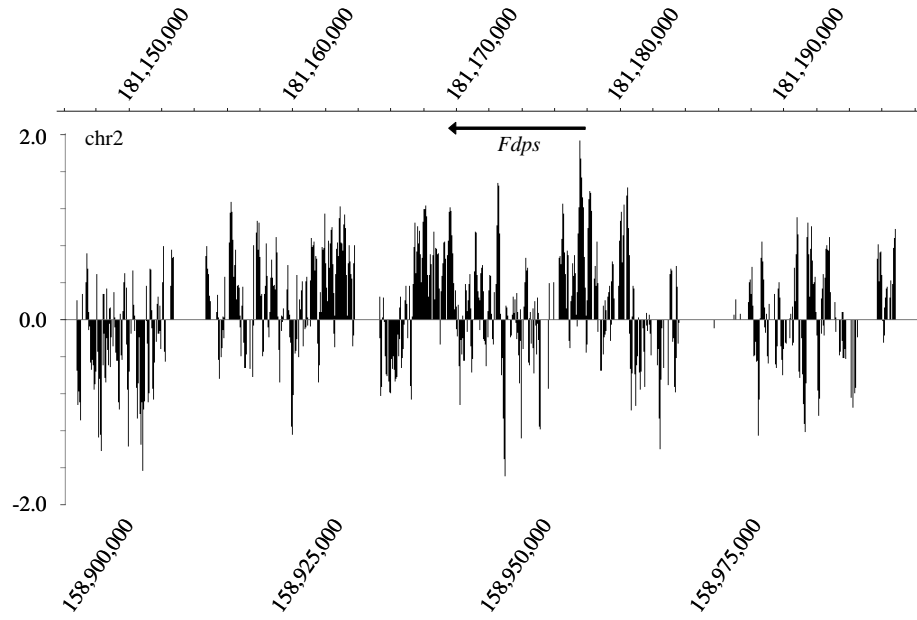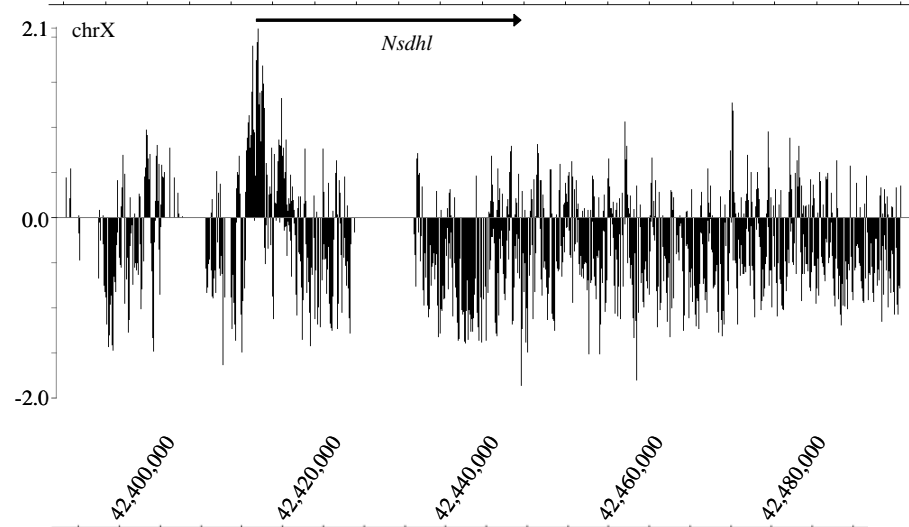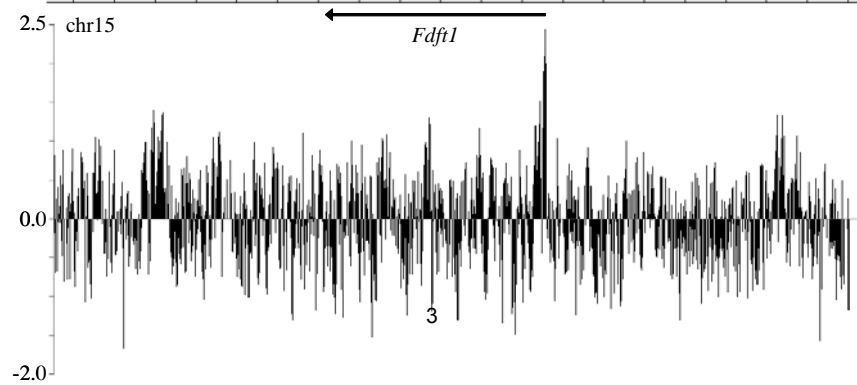

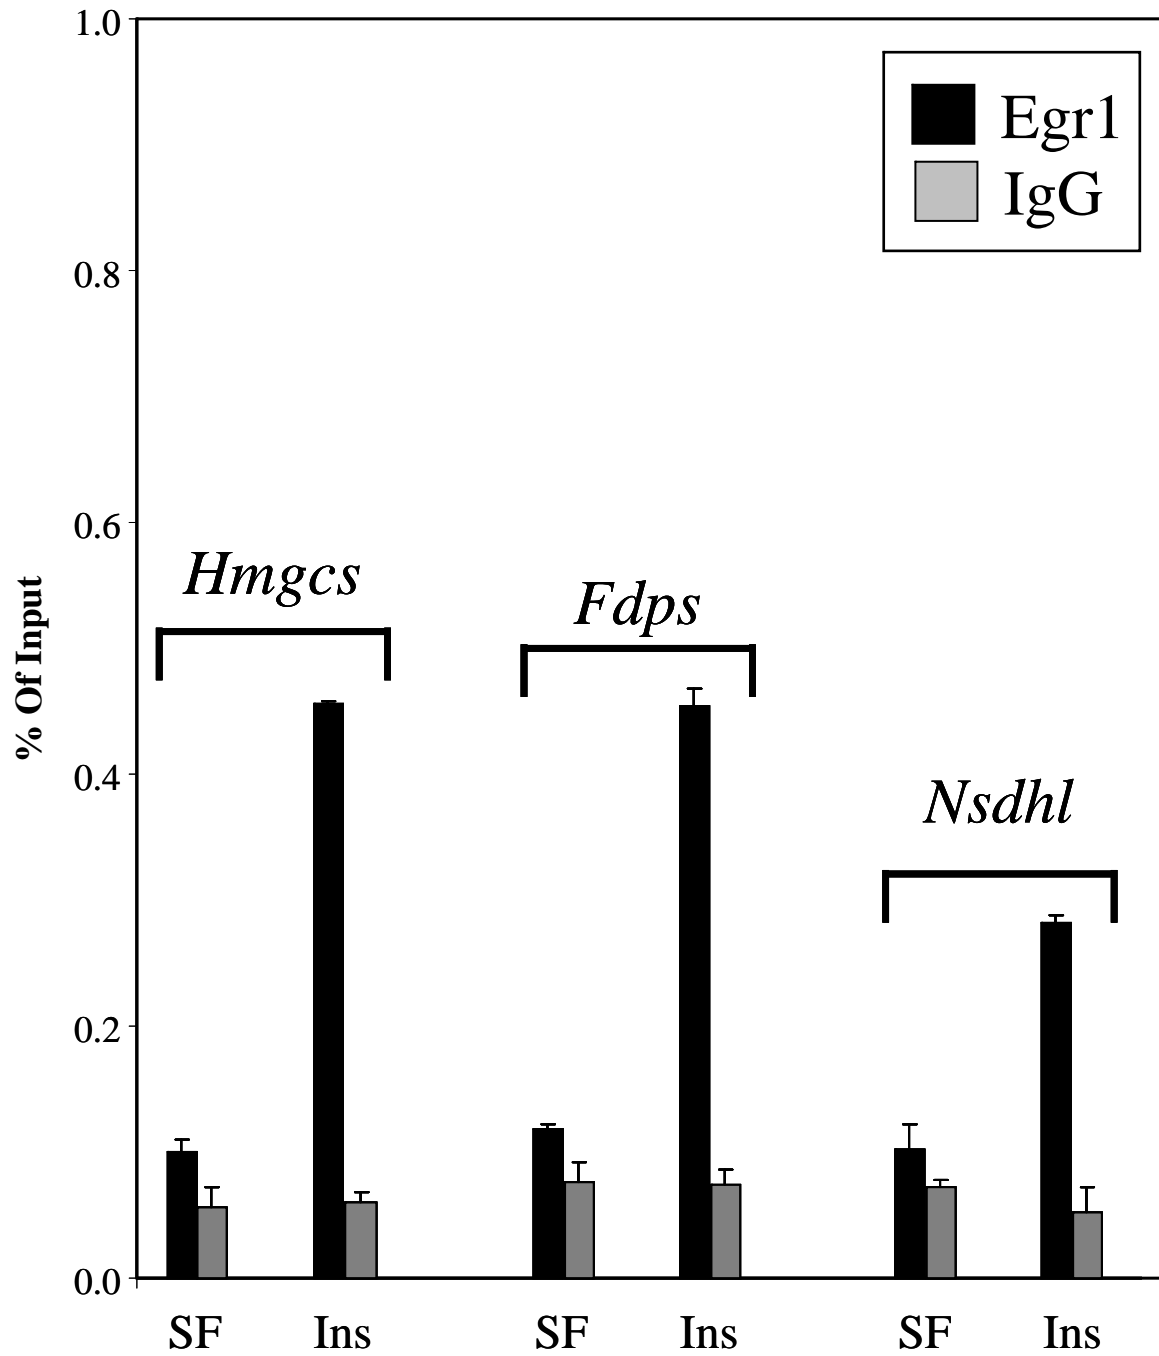

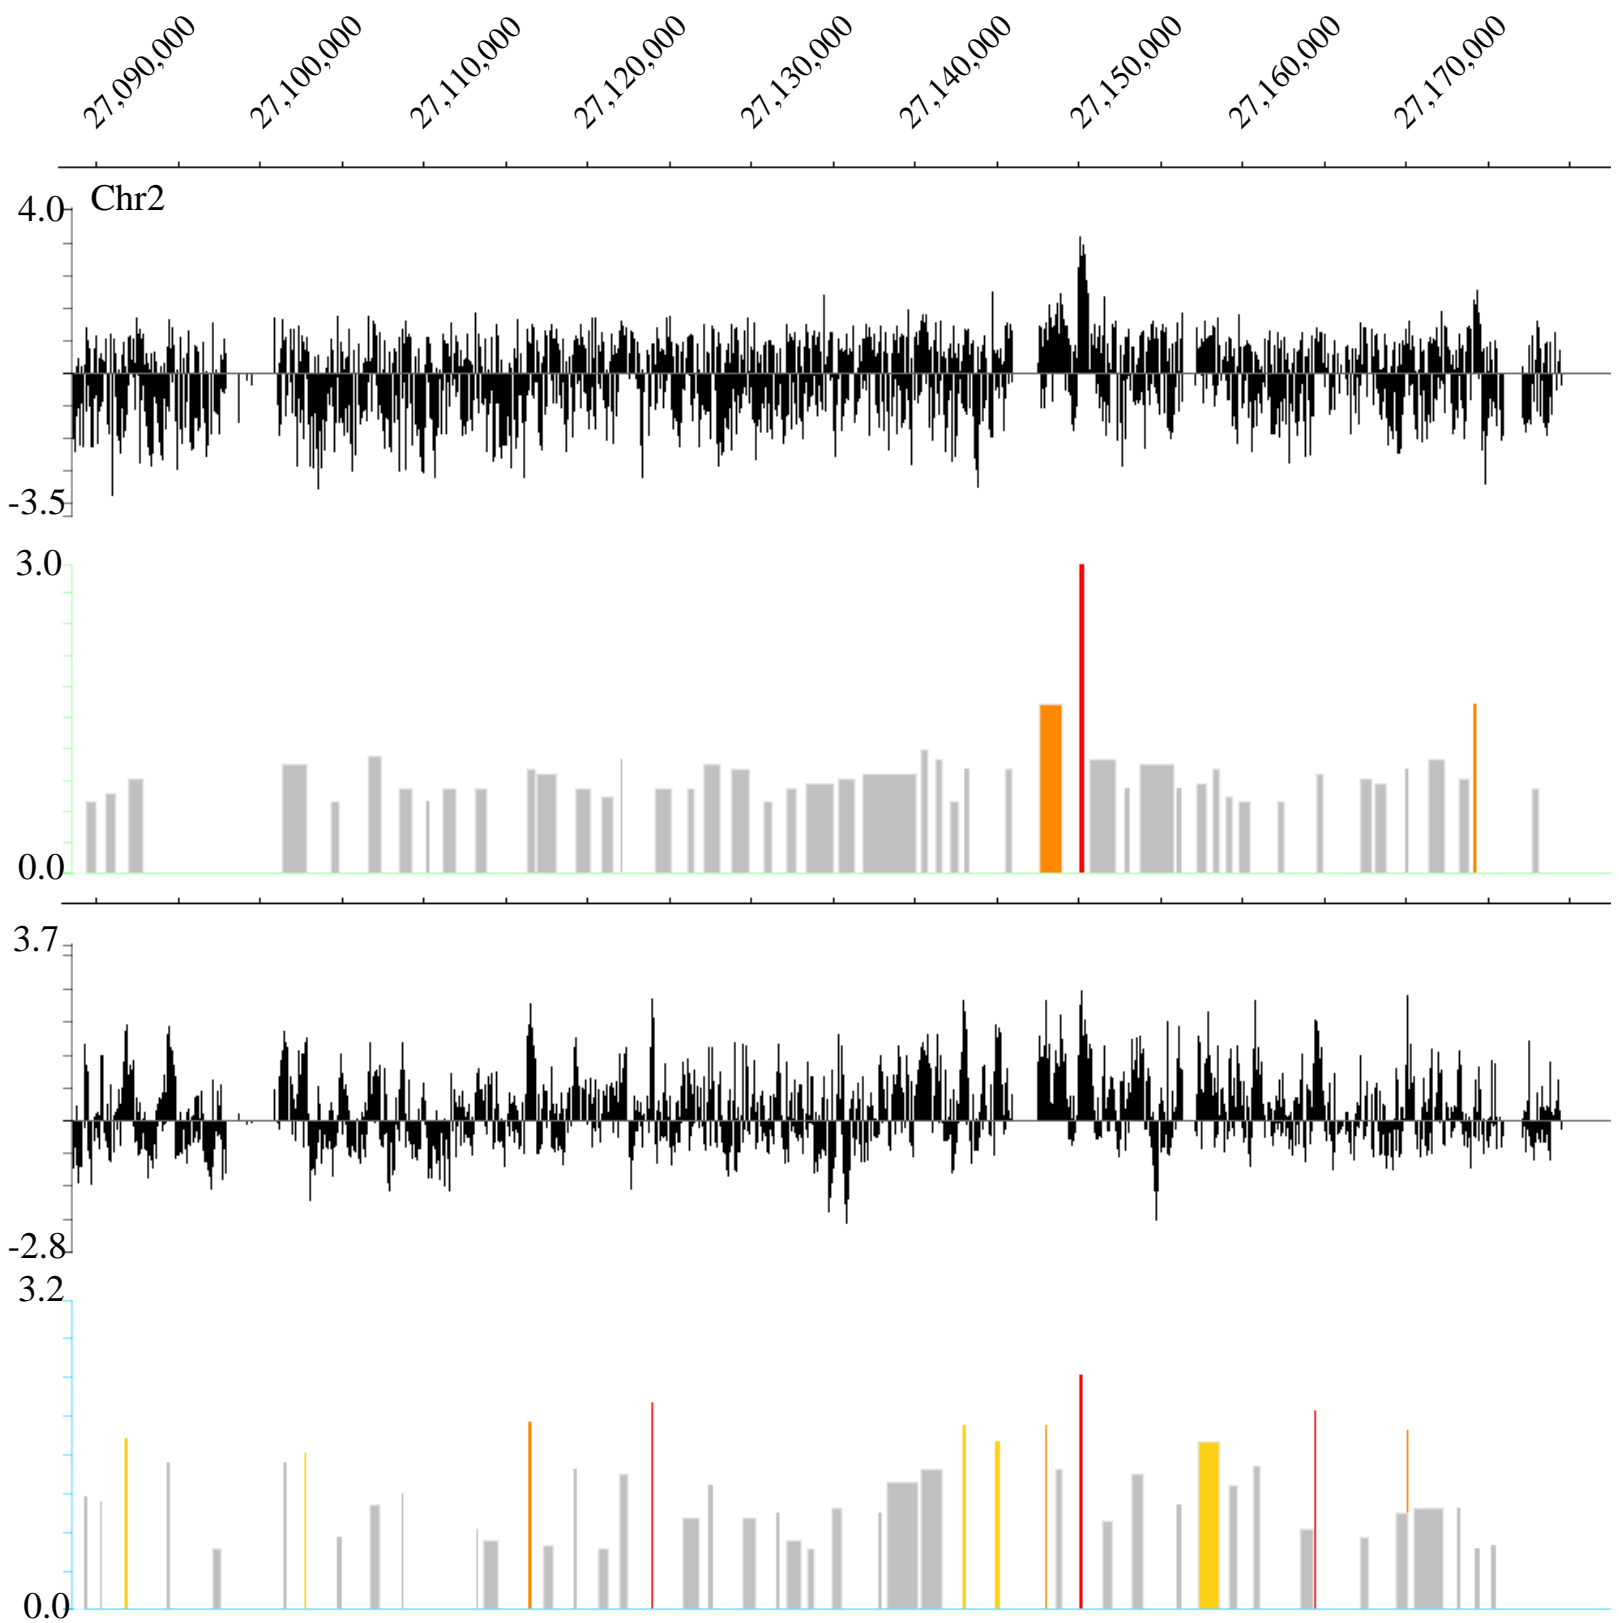

Minutes of  
Insulin Treatment

0

90

0

90

Egr1

Actin

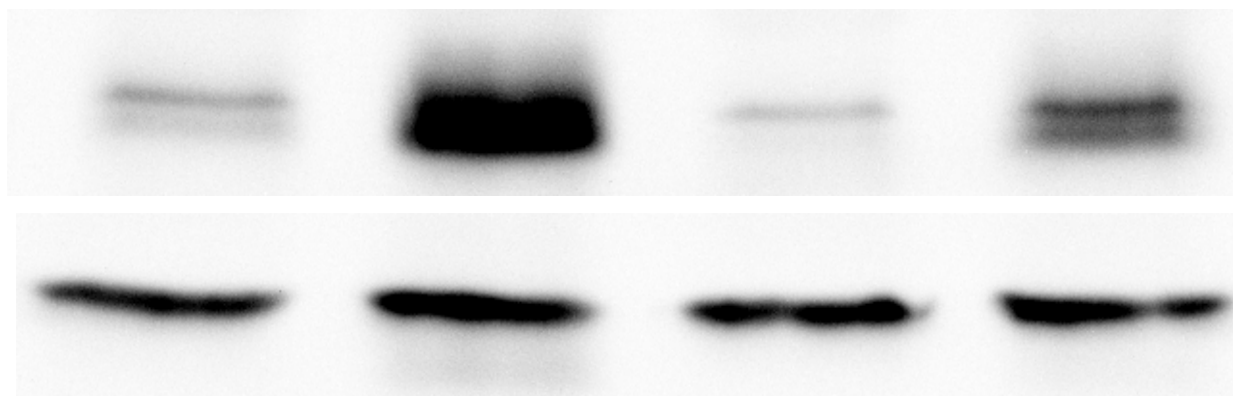

Control  
siRNA

Egr1  
siRNA

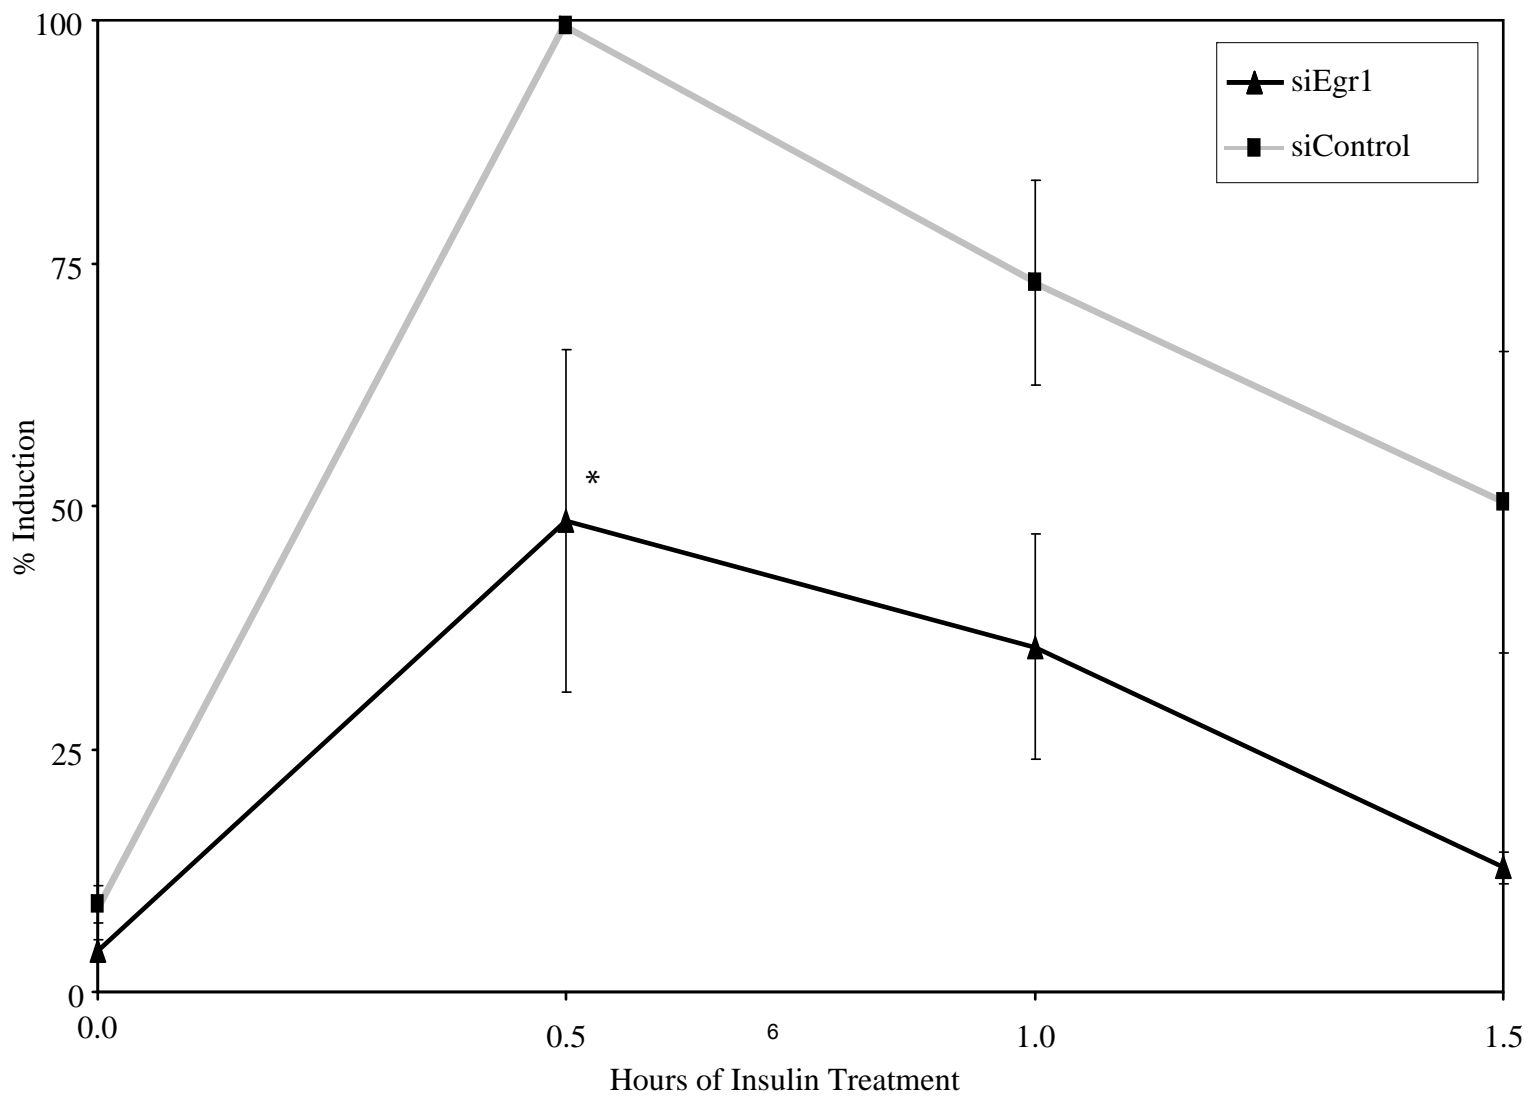

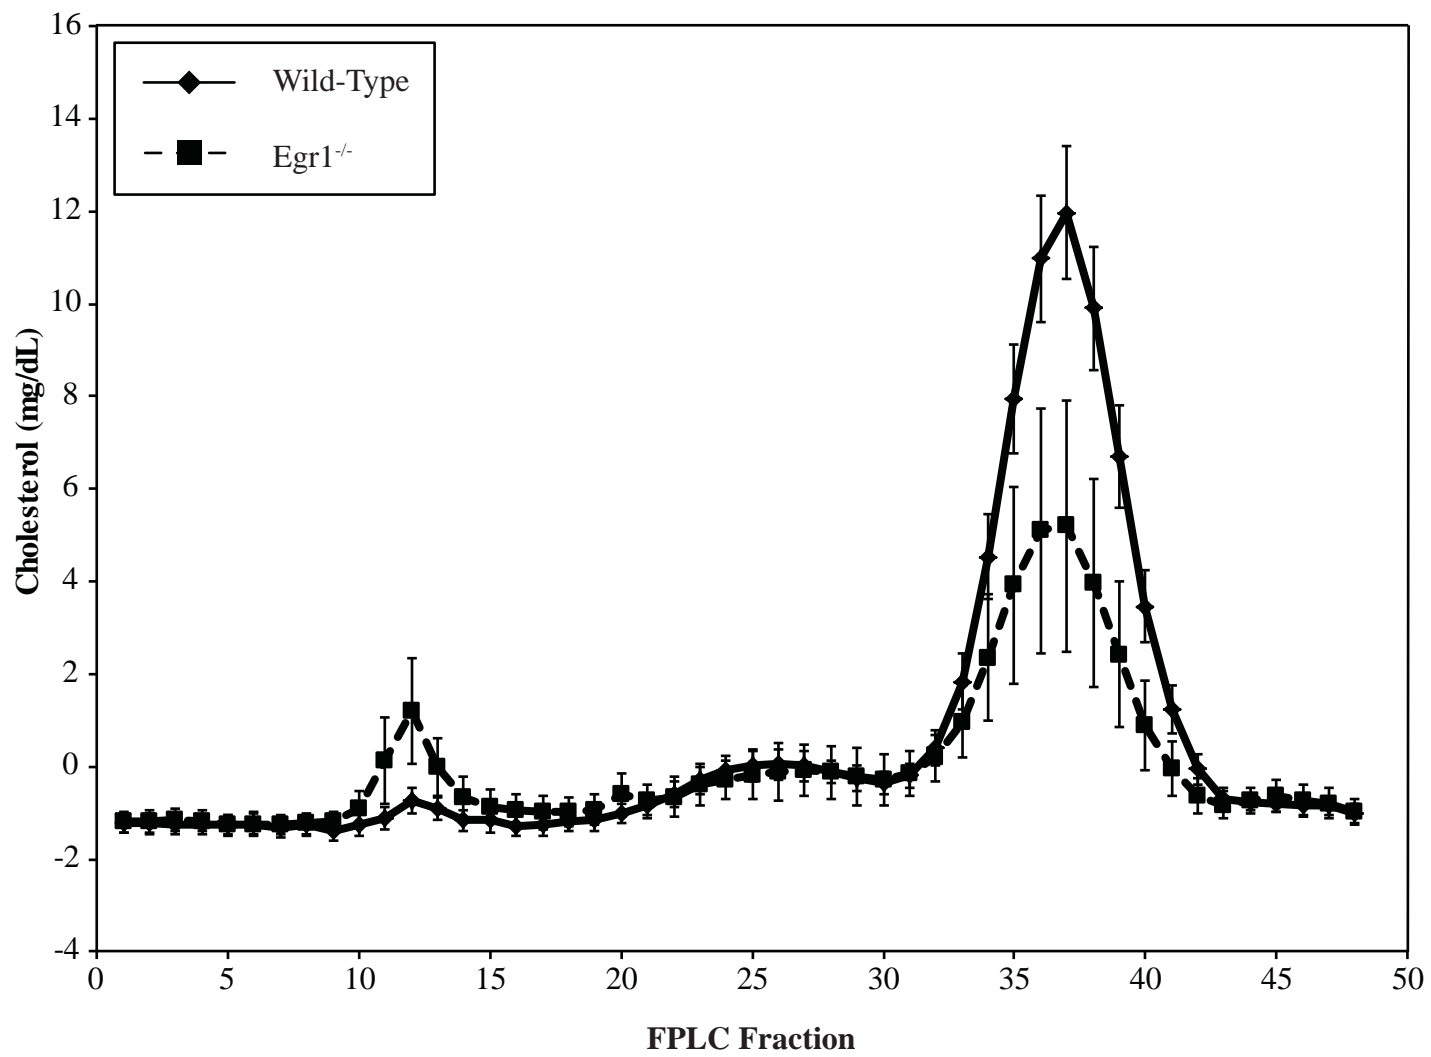

Supplement: supp_M111.263509_jbc.M111.263509-1.pdf [file supp_M111.263509_jbc.M111.263509-1.pdf]
